# Supplementary material
Source: PubMed Central journal article supplement (PMC2529049)
Supplement: 0806874105_0806874105SI.pdf [file 0806874105_0806874105SI.pdf]

# Supporting Information

Gavanescu *et al.* 10.1073/pnas.0806874105

## SI Materials and Methods

**Mice and Sera.** The *Aire*-knockout mutation, originally generated on a mixed [B6 × 129/Sv] F2 genetic background, was genotyped as described (1), and was backcrossed to the NOD and BALB/c backgrounds for more than eight generations (2). B6.μMT<sup>-/-</sup> mice (3) were purchased from the Jackson Laboratory and were genotyped with the sense primer 5'-CCGTCTAGCTTGAGC-TATTAGG-3' and anti-sense primer 5'-GAAGAGGACGAT-GAAGGTGG-3' for 35 cycles of a PCR with an annealing temperature of 55°C. They were either intercrossed with *Aire*<sup>+/-</sup> mice of the mixed B6 × 129 background, or were backcrossed to the NOD background for 12 generations, then intercrossed with NOD.*Aire*<sup>+/-</sup> mice. *Jh*-knockout mice on the BALB/c background were purchased from Taconic Farms and were genotyped for the deletion of the J region of the heavy chain with the sense primer 5'-CCAGGGACTCCACCAACACC-3' and anti-sense primer 5'-GTAAGAATGGCCTCTCCAGG-3', for 35 cycles of a PCR with an annealing temperature of 60°C. They were intercrossed with BALB/c.*Aire*<sup>+/-</sup> mice. NOD mice bearing the huCD20 transgene were typed with the sense primer 5'-TTGAGAGCAAATGACAACACCCA-3' and anti-sense primer 5'-AGGAAGCAGTGGAGGTGCCAAGAA-3' for 35 cycles of a PCR with an annealing temperature of 60°C. They were intercrossed with NOD.*Aire*<sup>+/-</sup> mice. All mice were housed and bred under specific-pathogen-free conditions at the Harvard Medical School Center for Animal Resources and Comparative Medicine.

**Flow Cytometry.** Cell suspensions were teased from spleens and analyzed by flow cytometry after immunostaining with anti-

CD19 (6D5), anti-CD45R (B220, RA3-6B2), anti-CD4<sup>+</sup>, and anti-CD8<sup>+</sup> Abs, conjugated either with fluorescein isothiocyanate or phycoerythrin (Caltag).

**Western Blotting.** The protein was briefly heated at 96°C, resolved on a 10% curtain gel by SDS/PAGE, and transferred onto polyvinylidene fluoride membrane (Bio-Rad Laboratories). The membrane was blocked for 1 h in a 5% milk solution in Tris-buffered saline (TBS; 25 mM Tris, pH 7.6, and 150 mM NaCl) and was probed in a Protean II Multiscreen apparatus (Bio-Rad Laboratories) with mouse sera diluted 1:500 for 2 h at 4°C. The membrane was washed with TBST (TBS, 0.1% Tween-20), incubated with horseradish peroxidase-conjugated donkey anti-mouse IgG (1:3,000) (Jackson ImmunoResearch), and was revealed with SuperSignal chemiluminescent substrate reagents (Pierce) by autoradiography.

**Serum IgG Measurement.** Test sera were diluted at 1:1,000 and added in duplicate to the ELISA plates for 1 h at room temperature (RT). Uncaptured serum Ig was washed as above. Alkaline-phosphatase-conjugated goat anti-mouse IgG (Fc-specific) (Jackson ImmunoResearch) was added at a dilution of 1:2,000 at RT for 1 h; the antibody incubation was followed by another set of four washes. Bound Ig was detected by measuring the absorbance at 405 nm of an alkaline phosphatase substrate, buffered with 9.6% diethanolamine (vol/vol H<sub>2</sub>O) and 2 M MgCl<sub>2</sub>, as recommended by the manufacturer (Sigma). Ig concentrations were calculated by relating absorptions of test samples to those of a standard curve.

1. Anderson MS, *et al.* (2002) Projection of an immunological self shadow within the thymus by the *aire* protein. *Science* 298:1395–1401.
2. Jiang W, *et al.* (2005) Modifier loci condition autoimmunity provoked by *Aire* deficiency. *J Exp Med* 202:805–815.

3. Kitamura D, Roes J, Kuhn R, Rajewsky K (1991) A B cell-deficient mouse by targeted disruption of the membrane exon of the immunoglobulin mu chain gene. *Nature* 350:423–426.

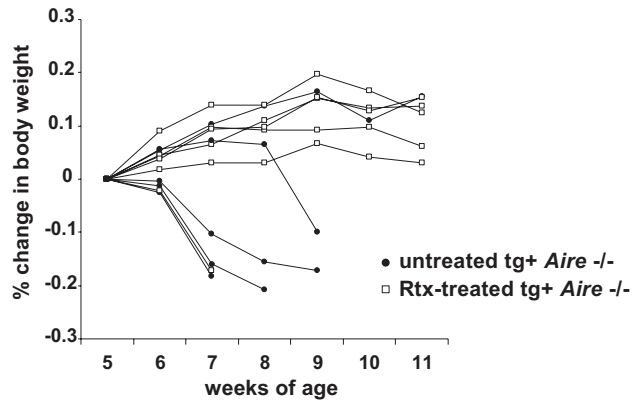

Fig. S1. Percent change in body weight in Rituximab-treated (●) and untreated (□) NOD.*Aire*<sup>-/-</sup> mice during a regimen initiated at 5 weeks of age.
